# Supplementary material
Source: publisher figshare collection journal article supplement (https://karger.figshare.com/ndownloader/files/26211188)
Supplement: Supplementary file 1 [file 26211188]

**Supplementary Material for Review**

**Suppl. table S1.** Database search strings used for systematic literature search

| **Database** | **Search string** | **Records found** |
| --- | --- | --- |
| Pubmed | **Search: ((((((((((genetic*[Title/Abstract]) OR (screen*[Title/Abstract])) OR (counsel*[Title/Abstract])) OR (CDKN2A[Title/Abstract])) OR (p16[Title/Abstract])) OR (famil*[Title/Abstract])) OR (hereditary[Title/Abstract])) OR (high-risk[Title/Abstract])) AND ((((((((((((((psychological[Title/Abstract]) OR (psychosocial[Title/Abstract])) OR (anxiety[Title/Abstract])) OR (depression[Title/Abstract])) OR (distress[Title/Abstract])) OR (worry[Title/Abstract])) OR (behaviour[Title/Abstract])) OR (behavior[Title/Abstract])) OR (clinical-skin-examination*[Title/Abstract])) OR (CSE[Title/Abstract])) OR (self-skin-examination*[Title/Abstract])) OR (SSE[Title/Abstract])) OR (sun-protective-behavior*[Title/Abstract])) OR (prevent*[Title/Abstract]))) AND (melanoma[Title/Abstract])) AND (melanoma[MeSH Terms]) Filters: from 1995 to 2020** | 1,082 |
| CINAHL | S1: AB melanoma  S2: (AB genetic* OR AB screen* OR AB counsel* OR AB CDKN2A OR AB p16 OR AB famil* OR AB hereditary OR AB high risk)  S3: (AB psychological OR AB psychosocial OR AB anxiety OR AB depression OR AB distress OR AB worry OR AB behaviour OR AB clinical-skin-exam* OR AB skin-self-exam* OR AB prevent* OR AB sun-protect)  S4: (S1 AND S2 AND S3)  Limiters – published date: 19950101-20201231  Expanders – apply equivalent subjects | 389 |
| Embase | #1: melanoma:kw  #2: genetic*:ab:ti OR screen*:ab:ti OR counsel*:ab:ti OR cdkn2a:ab:ti OR p16:ab:ti OR famil*:ab:ti OR hereditary:ab:ti OR ‘high risk’:ab:ti  #3: psychological:ab:ti OR psychosocial:ab:ti OR anxiety:ab:ti OR depression:ab:ti OR distress:ab:ti OR worry:ab:ti OR behaviour:ab:ti OR clinical-skin-exam*:ab:ti OR skin-self-exam:ab:ti OR prevent* OR sun-protect  #4: (#1 AND #2 AND #3) | 766 |
| PsycINFO | (((abstract: (psychological)) OR (abstract: (psychosocial)) OR (abstract: (anxiety)) OR (abstract: (depression)) OR (abstract: (distress)) OR (abstract: (worry)) OR (abstract: (behavior)) OR (abstract: (clinical-skin-exam*)) OR (abstract: (CSE)) OR (abstract: (self-skin-exam*)) OR (abstract: (prevent*)) OR (abstract: (sun-protect*))) AND ((Year: [1995 TO 2020]))) AND (((abstract: (genetic*)) OR (abstract: (screen*)) OR (abstract: (counsel*)) OR (abstract: (CDKN2A)) OR (abstract: (p16)) OR (abstract: (famil*)) AND (abstract: (hereditary)) AND (abstract: (high-risk))) AND ((Year: [1995 TO 2020]))) AND (((abstract: (melanoma))) AND ((Year: [1995 TO 2020]))) | 82 |
| Cochrane Library | Melanoma (titles/abstracts) | 33 |

**Suppl. table S2.** Quality assessment of records, using QualSyst Tool [18]

| **Quantitative studies** | **1. Question/objective sufficiently described?** | **2. Study design evident and appropriate?** | **3. Method of subject/comparison group selection or source of information/input variables described and appropriate?** | **4. Subject (and comparison group, if applicable) characteristics sufficiently described?** | **5. If interventional and random allocation was possible, was it described?** | **6. If interventional and blinding of investigators was possible, was it reported?** | **7. If interventional and blinding of subjects was possible, was it reported?** | **8. Outcome and (if applicable) exposure measure(s) well defined and robust to measurement/misclassification bias? Means of assessment reported?** | **9. Sample size appropriate?** | **10. Analytic methods described/justified and appropriate?** | **11. Is some estimate of variance reported for the main results?** | **12. Controlled for confounding?** | **13. Results reported in sufficient detail?** | **14. Conclusions supported by the results?** | **Total** |
| --- | --- | --- | --- | --- | --- | --- | --- | --- | --- | --- | --- | --- | --- | --- | --- |
| Riedijk [39], 2005 | 2 | 1 | 2 | 2 | n.a. | n.a. | n.a. | 2 | 1 | 2 | 1 | 1 | 2 | 2 | 82% |
| de Snoo [22], 2008 | 2 | 2 | 2 | 2 | n.a. | n.a. | n.a. | 2 | 1 | 2 | 2 | 1 | 2 | 2 | 91% |
| Kasparian [23], 2008 | 2 | 2 | 2 | 2 | n.a. | n.a. | n.a. | 2 | 1 | 2 | 2 | 2 | 2 | 2 | 95% |
| Bergenmar [40], 2009 | 2 | 2 | 2 | 2 | n.a. | n.a. | n.a. | 2 | 1 | n.a. | 2 | n.a. | 2 | 2 | 95% |
| Kasparian [20], 2009 | 2 | 2 | 2 | 2 | n.a. | n.a. | n.a. | 2 | 1 | 2 | 2 | 2 | 2 | 2 | 95% |
| Leaf [46], 2010 | 2 | 2 | 1 | 2 | n.a. | n.a. | n.a. | 1 | 1 | 2 | 1 | 1 | 2 | 2 | 77% |
| Taber [49], 2010 | 2 | 2 | 1 | 2 | n.a. | n.a. | n.a. | 2 | 1 | 2 | 2 | 2 | 2 | 2 | 91% |
| Christensen [21], 2011 | 2 | 2 | 2 | 2 | n.a. | n.a. | n.a. | 2 | 0 | 2 | 2 | 1 | 2 | 2 | 86% |
| Bränström [41], 2012 | 2 | 2 | 2 | 2 | n.a. | n.a. | n.a. | 2 | 2 | 2 | 2 | 1 | 2 | 2 | 95% |
| Aspinwall [24], 2013 | 2 | 2 | 1 | 2 | n.a. | n.a. | n.a. | 2 | 1 | 2 | 0 | 1 | 2 | 2 | 77% |
| Glanz [42], 2013 | 2 | 2 | 2 | 2 | 2 | n.a. | n.a. | 2 | 1 | 2 | 2 | 2 | 2 | 2 | 96% |
| Aspinwall [43], 2014 | 2 | 2 | 1 | 2 | n.a. | n.a. | n.a. | 2 | 1 | 2 | 0 | 1 | 2 | 2 | 77% |
| Aspinwall [45], 2015 | 2 | 2 | 1 | 2 | n.a. | n.a. | n.a. | 2 | 1 | 2 | 1 | 1 | 2 | 2 | 82% |
| Taber [44], 2015 | 2 | 2 | 2 | 2 | n.a. | n.a. | n.a. | 2 | 1 | 2 | 1 | 1 | 2 | 2 | 86% |
| Levin [48], 2017 | 2 | 2 | 1 | 1 | n.a. | n.a. | n.a. | 1 | 2 | 2 | n.a. | n.a. | 2 | 1 | 78% |
| Aspinwall [50], 2018 | 2 | 1 | 2 | 2 | n.a. | n.a. | n.a. | 2 | 1 | 2 | 1 | 2 | 2 | 2 | 86% |
| Stump [26], 2018 | 2 | 2 | 2 | 2 | n.a. | n.a. | n.a. | 2 | 1 | 2 | 1 | 1 | 2 | 2 | 86% |
| Zhu [25], 2018 | 2 | 2 | 2 | 2 | n.a. | n.a. | n.a. | 2 | 2 | 2 | 1 | 1 | 2 | 2 | 91% |
| Leof [27], 2019 | 2 | 2 | 2 | 2 | n.a. | n.a. | n.a. | 2 | 1 | 2 | 2 | 2 | 2 | 2 | 95% |
| **Qualitative studies** | **1. Question/objective clearly described?** | **2. Design evident and appropriate to answer study question?** | **3. Is context for the study clear?** | **4. Connection to a theoretical framework/wider body of knowledge?** | **5. Sampling strategy described, relevant and justified?** | **6. Data collection methods clearly described and systematic?** | **7. Data analysis clearly described, complete and systematic?** | **8. Use of verification procedure(s) to establish credibility of the study?** | **9. Conclusion supported by the results?** | **10. Reflexivity of the account?** |  |  |  |  | **Total** |
| Kasparian [28], 2006 | 2 | 2 | 2 | 2 | 2 | 2 | 2 | 2 | 2 | 0 |  |  |  |  | 90% |
| Kasparian [47], 2007 | 2 | 2 | 2 | 2 | 2 | 2 | 2 | 2 | 2 | 0 |  |  |  |  | 90% |

The above criteria were scored either a “2” for yes, “1” for partial or “0” for no, as per guidelines provided by Qualsyst Tool guidelines [18].
